# Supplementary material
Source: PubMed Central journal article supplement (PMC8904641)
Supplement: NIHMS1738082-supplement-Supplementary_Materials__figures__tables.pdf [file NIHMS1738082-supplement-Supplementary_Materials__figures__tables.pdf]

## **Supplementary Information**

**Appendix A** – PRISMA Flow Diagram

**Appendix B** – Overview of Published Clinical Trials of Chronic Pain Treatments and Benefit-Risk Assessment

**Appendix C** – United States Food and Drug Administration and Benefit-Risk Assessment

**Appendix D** – European Medicines Agency and Benefit-Risk Assessment

**Appendix E** – National Academies of Science, Engineering, and Medicine (including Institute of Medicine) and Benefit-Risk Assessment

## Appendix A. PRISMA Flow Diagram

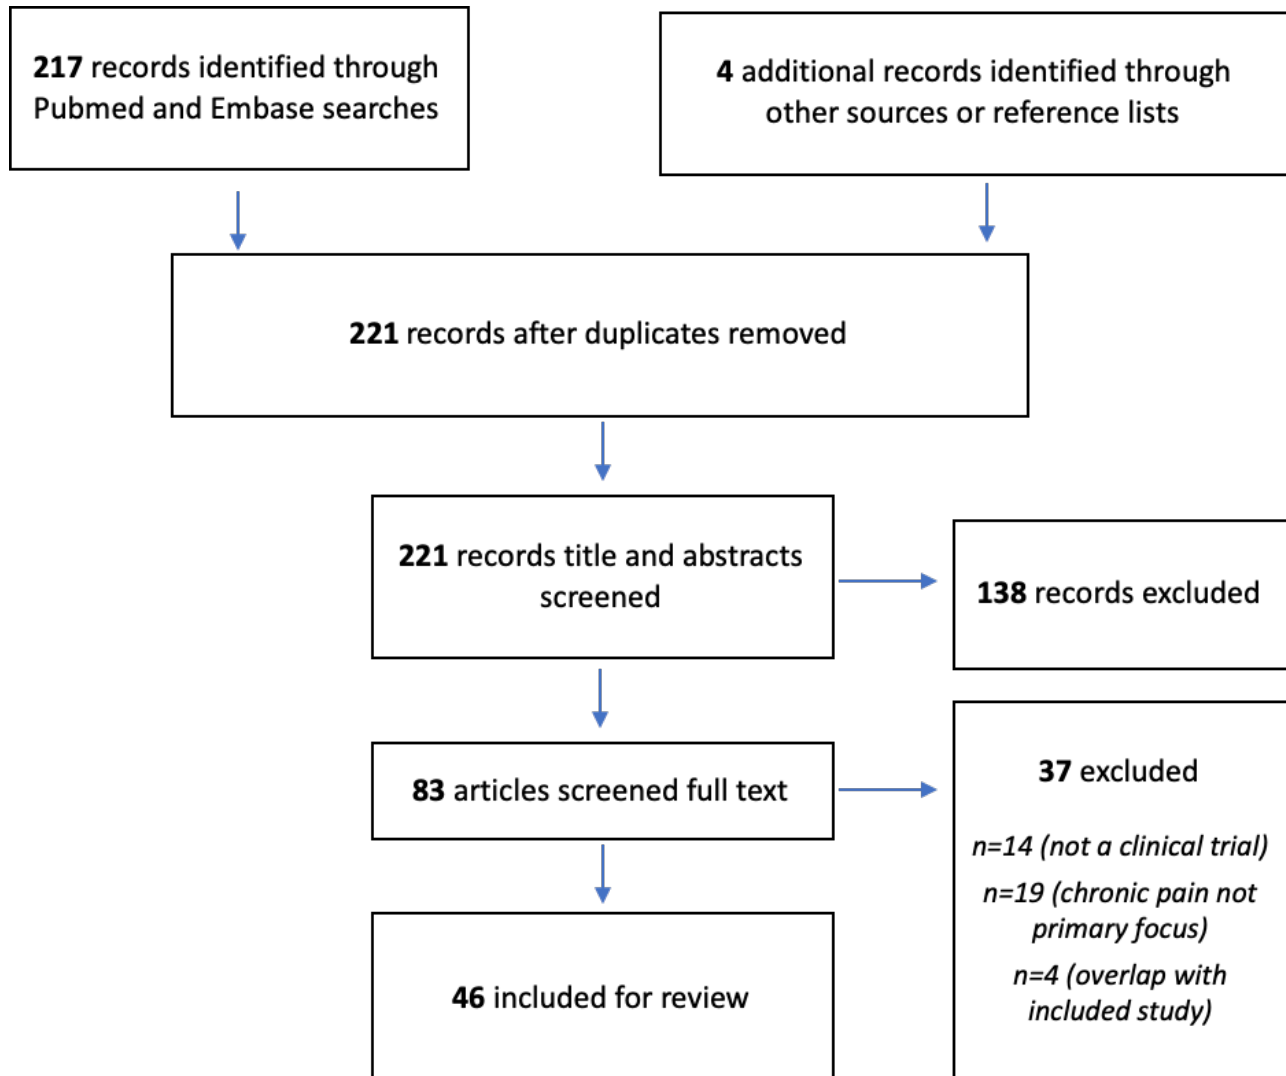

## **Appendix B. Literature Review of Published Clinical Trials of Chronic Pain Treatments and Benefit-Risk Assessment**

**Objective.** The review's goal was to provide a “snapshot” of whether formal, structured, or systematic approaches to benefit-risk assessment are being used in clinical trials of chronic pain treatments.

**Literature Search and Data Extraction.** The literature search was limited to trials published between January 2010 to December 2019 and was conducted in PubMed, PsychInfo, and Embase databases with the following search string (modified for each database and using various combinations of the following search terms): ((benefit and risk) or (risk-benefit or benefit-risk)) and (method\* or analys\* or assessment or appraisal or ratio or model or framework) and (chronic pain) and (clinical trial or randomized controlled trial). All eligible studies and documents from the searches were reviewed and data were extracted by the first author (BAK), who developed a narrative summary. Extracted data included sample size and patient characteristics (age, gender, duration of primary diagnosis), chronic pain diagnosis (method of diagnosis and conditions), study design (i.e., treatment type, comparators), methods and results of benefit-risk analysis (types of data and/or statistical analyses), and funding source.

**Evidence Summary.** Forty-six clinical trials of chronic pain treatments published between 2010 and 2019 were identified for review (Supplementary Information). None of these 46 peer-reviewed publications reported a planned analysis that combined benefit and risk outcomes into an integrated, benefit-risk outcome. Five of the studies descriptively discussed benefits related to risks [4; 72; 90; 108; 156], but only as isolated statements in the text of the publication rather than through a formal evaluation. Two examples of such statements were as follows: (1) “The safety profile was similar for patients receiving weekly therapy and those receiving EOW [every other week] therapy. Given the apparent increase in efficacy achieved with the higher dose, the risk–benefit balance seems to favor weekly dosing.” [90]; (2) “These results indicate that the benefit and risk considerations in CLBP [chronic low back pain] patients with high vs. low NA [negative affect] are distinctly different... Thus, negative affect is an important phenotypic variable to characterize at baseline, prior to deciding whether to prescribe opioids for CLBP.” [156]. Most of the primary outcomes across studies focused on the benefits of treatment, not risks, including reductions in pain severity, functional improvements, reduction in anxiety or depression, and opioid misuse and craving (Supplementary Information). In contrast, a subset of studies focused on harms, rather than benefits, as the primary outcome of interest (e.g., AEs, opioid misuse) [56; 64; 155]. These studies were designed to evaluate treatments with abuse potential, including cannabis and hydrocodone extended-release, which prompted a focus on risks rather than benefits in the study analyses. An additional 10 studies declared no primary outcomes.

| Study                          | Pain Type                                 | Intervention                                                             | Benefit and Risk Outcomes                                                                                                                                                                          |
|--------------------------------|-------------------------------------------|--------------------------------------------------------------------------|----------------------------------------------------------------------------------------------------------------------------------------------------------------------------------------------------|
| <b>Abdely-Meguid, 2018 [1]</b> | Chronic prostatitis/ pelvic pain syndrome | onabotulinum-toxin-A                                                     | <i>Analyzed Separately</i><br><b>Benefits:</b> *Proportion of responders represented by 6 points or greater reduction in total score on NIH-Chronic Prostatitis Symptom Index<br><b>Risks:</b> AEs |
| <b>Al-Ajlouni, 2015 [3]</b>    | Knee osteoarthritis                       | autologous platelet lysate percutaneous injection.                       | <i>Analyzed Separately</i><br><b>Benefits:</b> *Knee Osteoarthritis and Disability Outcome Score<br><b>Risks:</b> Complications including infection and hospitalization                            |
| <b>Alev, 2017 [4]</b>          | Low back                                  | duloxetine                                                               | <i>Analyzed Separately</i><br><b>Benefits:</b> *Proportion of patients with ≥30% reduction in pain<br><b>Risks:</b> AEs                                                                            |
| <b>Asbury, 2012 [7]</b>        | Refractory angina                         | cardiac rehabilitation                                                   | <i>Analyzed Separately</i><br><b>Benefits:</b> *Anxiety and depression.<br><b>Risks:</b> None                                                                                                      |
| Blumenfeld, 2018[10]           | Chronic migraine                          | onabotulinum-toxin-A                                                     | <i>Analyzed Separately</i><br><b>Benefits:</b> *Reduction in headache days<br><b>Risks:</b> AEs                                                                                                    |
| <b>Brage et al. [14]</b>       | Neck                                      | pain education/ training (neck-shoulder exercises, balance and aerobics) | <i>Analyzed Separately</i><br><b>Benefits:</b> Reduction in neck pain, function and global perceived effect; no primary outcomes declared<br><b>Risks:</b> None                                    |
| <b>Burmester et al. [17]</b>   | Rheumatoid arthritis                      | tofacitinib                                                              | <i>Analyzed Separately</i><br><b>Benefits:</b> *American College of Rheumatology response rate, *disability, *rates of disease activity score<br><b>Risk:</b> AEs                                  |
| <b>Buvanendran et al. [19]</b> | Knee                                      | pregabalin                                                               | <i>Analyzed Separately</i><br><b>Benefits:</b> *Reduction in neuropathic pain<br><b>Risks:</b> AEs                                                                                                 |

| Study                        | Pain Type                 | Intervention                                    | Benefit and Risk Outcomes                                                                                                                                                             |
|------------------------------|---------------------------|-------------------------------------------------|---------------------------------------------------------------------------------------------------------------------------------------------------------------------------------------|
| <b>Chen et al. [24]</b>      | Knee                      | acupuncture and exercise-based physical therapy | <i>Analyzed Separately</i><br><b>Benefits:</b> *Proportion with at least 36% improvement in Western Ontario and McMaster Universities Osteoarthritis Index score<br><b>Risks:</b> AEs |
| <b>Choi and Huang [26]</b>   | Functional abdominal pain | dietary supplement                              | <i>Analyzed Separately</i><br><b>Benefits:</b> *Presence of recurrent abdominal pain and reductions in pain; *quality of life<br><b>Risks:</b> Drug toxicity and psychiatric outcomes |
| <b>Dear et al. [32]</b>      | Variety                   | internet-delivered pain management program      | <i>Analyzed Separately</i><br><b>Benefits:</b> *Disability; *health outcomes including anxiety<br><b>Risks:</b> None                                                                  |
| <b>Garland et al. [56]</b>   | Non-cancer pain           | Mindfulness-Oriented Recovery                   | <i>Analyzed Separately</i><br><b>Benefits:</b> *Reduction in pain severity and interference<br><b>Risks:</b> *Opioid craving and misuse                                               |
| <b>Garland et al. [55]</b>   | Bone cancer pain          | Mindfulness-Oriented Recovery Enhancement       | <i>Analyzed Separately</i><br><b>Benefits:</b> Reduction in pain severity<br><b>Risks:</b> Opioid misuse                                                                              |
| <b>Hale et al. [64]</b>      | Variety                   | hydrocodone extended release                    | <i>Analyzed Separately</i><br><b>Benefits:</b> None<br><b>Risks:</b> *AEs                                                                                                             |
| <b>Hardy et al. [66]</b>     | Cancer pain               | ketamine                                        | <i>Analyzed Separately</i><br><b>Benefits:</b> *Pain improvement<br><b>Risks:</b> AEs                                                                                                 |
| <b>Hearn and Finlay [69]</b> | Spinal cord injury        | internet-delivered mindfulness                  | <i>Analyzed Separately</i><br><b>Benefits:</b> Reduction in depression symptom severity<br><b>Risks:</b> none                                                                         |

| Study                       | Pain Type                        | Intervention                                                                                          | Benefit and Risk Outcomes                                                                                                           |
|-----------------------------|----------------------------------|-------------------------------------------------------------------------------------------------------|-------------------------------------------------------------------------------------------------------------------------------------|
| Hofmann et al. [72]         | Osteoarthritis and low back      | tapentadol prolonged release                                                                          | <i>Analyzed Separately</i><br><b>Benefits:</b> *Reduction in pain intensity<br><b>Risks:</b> AEs                                    |
| Izquierdo Perez et al. [80] | Neck                             | manual therapy                                                                                        | <i>Analyzed Separately</i><br><b>Benefits:</b> *Reduction in pain intensity<br><b>Risks:</b> AEs                                    |
| Jay et al. [83]             | Variety                          | physical, cognitive, and mindfulness group-based training                                             | <i>Analyzed Separately</i><br><b>Benefits:</b> *Pain intensity<br><b>Risks:</b> None                                                |
| Kendall et al. [89]         | Neck                             | instrument-assisted cervical and thoracic spine manipulation plus massage/mobilization/exercises/heat | <i>Analyzed Separately</i><br><b>Benefits:</b> *Reductions in dizziness handicap inventory and neck disability<br><b>Risks:</b> AEs |
| Kimball et al. [90]         | Hidradenitis suppurativa         | Adalimumab                                                                                            | <i>Analyzed Separately</i><br><b>Benefits:</b> *Improvement in hidradenitis suppurativa severity score<br><b>Risks:</b> AEs         |
| Kivitz et al. [91]          | Low back                         | intravenous tanezumab                                                                                 | <i>Analyzed Separately</i><br><b>Benefits:</b> *Pain intensity<br><b>Risks:</b> AEs                                                 |
| Lee et al. [98]             | Prostatitis/pelvic pain syndrome | acupuncture                                                                                           | <i>Analyzed Separately</i><br><b>Benefits:</b> *Integrity of blinding<br><b>Risks:</b> None                                         |
| Licciardone et al. [101]    | Low back                         | osteopathic manual treatment and ultrasound therapy                                                   | <i>Analyzed Separately</i><br><b>Benefits:</b> Pain ratings<br><b>Risks:</b> None                                                   |

| Study                    | Pain Type          | Intervention                                                      | Benefit and Risk Outcomes                                                                                                                           |
|--------------------------|--------------------|-------------------------------------------------------------------|-----------------------------------------------------------------------------------------------------------------------------------------------------|
| Lluch et al. [102]       | Neck               | assisted plus active cranio-cervical flexion exercise             | <i>Analyzed Separately</i><br><b>Benefits:</b> Cranio-cervical flexion test, cervical range of motion, and pain were assessed<br><b>Risks:</b> None |
| Masala et al. [104]      | Pudendal neuralgia | computed tomography-guided percutaneous pulse-Dose radiofrequency | <i>Analyzed Separately</i><br><b>Benefits:</b> Reduction in pain intensity<br><b>Risks:</b> None                                                    |
| Mecklenburg et al. [106] | Knee               | Hinge Health digital care remotely delivered                      | <i>Analyzed Separately</i><br><b>Benefits:</b> *Reduction in pain; *improved physical functioning<br><b>Risks:</b> AEs                              |
| Molegraaf et al. [108]   | Abdominal          | laparoscopic adhesiolysis                                         | <i>Analyzed Separately</i><br><b>Benefits:</b> *Reduction in pain<br><b>Risks:</b> None                                                             |
| Monticone et al. [109]   | Neck               | rehabilitation program exercises, cognitive-behavioral therapy    | <i>Analyzed Separately</i><br><b>Benefits:</b> *Reduction in disability<br><b>Risks:</b> None                                                       |
| Persson et al. [117]     | Neck               | Chinese medicine Qigong                                           | <i>Analyzed Separately</i><br><b>Benefits:</b> Reduction in pain intensity<br><b>Risks:</b> None                                                    |
| Petersen et al. [119]    | Low back           | McKenzie method/physical therapy                                  | <i>Analyzed Separately</i><br><b>Benefits:</b> Reduction in disability<br><b>Risks:</b> None                                                        |
| Saner et al. [128]       | Low back           | tailored exercise program                                         | <i>Analyzed Separately</i><br><b>Benefits:</b> *Improved function<br><b>Risks:</b> None                                                             |

| Study                     | Pain Type                      | Intervention                                | Benefit and Risk Outcomes                                                                                                                |
|---------------------------|--------------------------------|---------------------------------------------|------------------------------------------------------------------------------------------------------------------------------------------|
| Sanga et al. [129]        | Chronic osteoarthritis         | subcutaneous fulranumab (                   | <i>Analyzed Separately</i><br><b>Benefits:</b> *Reduction in pain<br><b>Risks:</b> AEs                                                   |
| Sieper et al. [133]       | Spondylo-arthritis             | golimumab                                   | <i>Analyzed Separately</i><br><b>Benefits:</b> *20% improvement in SpondyloArthritis International Society criteria<br><b>Risks:</b> AEs |
| Stahlschmidt et al. [140] | Various (pediatric population) | interdisciplinary pain treatment            | <i>Analyzed Separately</i><br><b>Benefits:</b> Treatment satisfaction<br><b>Risks:</b> None                                              |
| Takahashi et al. [141]    | Neck                           | laser therapy                               | <i>Analyzed Separately</i><br><b>Benefits:</b> Pain<br><b>Risks:</b> None                                                                |
| Tan et al. [142]          | Low back                       | self-hypnosis trainings                     | <i>Analyzed Separately</i><br><b>Benefits:</b> Pain intensity, pain interference, and sleep quality<br><b>Risks:</b> None                |
| Tchivileva et al. [143]   | TMDs                           | propranolol                                 | <i>Analyzed Separately</i><br><b>Benefits:</b> *Pain intensity<br><b>Risks:</b> AEs                                                      |
| Thompson et al. [145]     | Neck                           | interactive behavioral modification therapy | <i>Analyzed Separately</i><br><b>Benefits:</b> *Disability<br><b>Risks:</b> None                                                         |
| Valenza et al. [150]      | Low back                       | pilates exercise                            | <i>Analyzed Separately</i><br><b>Benefits:</b> *Disability; *pain ratings<br><b>Risks:</b> None                                          |



| Study                 | Pain Type        | Intervention                               | Benefit and Risk Outcomes                                                                               |
|-----------------------|------------------|--------------------------------------------|---------------------------------------------------------------------------------------------------------|
| Verra et al. [152]    | Back             | rehabilitation program                     | <i>Analyzed Separately</i><br><b>Benefits:</b> *Disability<br><b>Risks:</b> None                        |
| Ware et al. [155]     | Variety          | herbal cannabis                            | <i>Analyzed Separately</i><br><b>Benefits:</b> None<br><b>Risks:</b> *AEs                               |
| Wasan et al. [156]    | Low back         | oral morphine or oxycodone                 | <i>Analyzed Separately</i><br><b>Benefits:</b> *percent pain improvement<br><b>Risks:</b> opioid misuse |
| Williams et al. [158] | Low back         | telephone-based healthy lifestyle coaching | <i>Analyzed Separately</i><br><b>Benefits:</b> *pain intensity<br><b>Risks:</b> AEs                     |
| Wilson et al. [160]   | Shoulder         | peripheral nerve stimulation               | <i>Analyzed Separately</i><br><b>Benefits:</b> *worst pain last week<br><b>Risks:</b> AEs               |
| Yoon et al. [162]     | Musculo-skeletal | transdermal buprenorphine                  | <i>Analyzed Separately</i><br><b>Benefits:</b> *pain reduction<br><b>Risks:</b> AEs                     |

Note: Asterisk\* represents primary outcome(s) in associated publication. AE (adverse event); TMDs (temporomandibular disorders); Overall, 39 of the studies in the table were randomized (85%) and types of interventions included (study counts in parentheses): pharmacological (18), physical activity or physical/occupational therapy (13), cognitive-behavioral therapy (8 studies), mindfulness (8), psychosocial support (8), manual therapy/chiropractic (4), acupuncture (2), and mind-body (2). The following interventions were represented in 1 study each: biofeedback, laser therapy, peripheral nerve stimulation, radiofrequency, and surgery. The chronic pain conditions examined across studies included (most to least frequent): back/lower back pain (12), neck pain (8), arthritis-related pain (4), knee pain (3), prostatitis/pudendal neuralgia/pelvic pain (3), and abdominal pain (2). Angina, cancer-related pain, migraine headache, hidradenitis suppurativa (a painful skin condition), musculoskeletal pain, shoulder pain, spinal cord injury-related pain, and temporomandibular disorders were each evaluated in 1 study. Six studies various types of chronic pain conditions in the same study.

The only criteria for inclusion in this review is that the study was a clinical trial. Therefore, a portion of the studies reviewed reported no risk outcomes and one study reported no benefit outcome.

## Appendix C - Food and Drug Administration and Benefit-Risk Assessment

| Title                                                                                                                   | Date       | FDA Organization                                                                      | Topic                                             | URL                                                                                                                                                                                                                                                                                                                                                           |
|-------------------------------------------------------------------------------------------------------------------------|------------|---------------------------------------------------------------------------------------|---------------------------------------------------|---------------------------------------------------------------------------------------------------------------------------------------------------------------------------------------------------------------------------------------------------------------------------------------------------------------------------------------------------------------|
| <b>Structured Approach to Benefit Risk Assessment in Drug Regulatory Decision-Making PDUFA V Implementation Plan</b>    | 01-July-13 | Center for Drug Evaluation and Research                                               | Medicinal Product                                 | <a href="https://www.fda.gov/media/84831/download">https://www.fda.gov/media/84831/download</a>                                                                                                                                                                                                                                                               |
| <b>Periodic B/R Evaluation Report (PBRER)</b>                                                                           | 18-July-16 | Center for Drug Evaluation and Research, Center for Biologics Evaluation and Research | Periodic B/R Evaluation Report (PBRER)            | <a href="https://www.fda.gov/regulatory-information/search-fda-guidance-documents/e2cr2-periodic-B/R-evaluation-report-pbrer">https://www.fda.gov/regulatory-information/search-fda-guidance-documents/e2cr2-periodic-B/R-evaluation-report-pbrer</a>                                                                                                         |
| <b>Periodic B/R Evaluation Report – Questions and Answers</b>                                                           | 18-July-16 | Center for Drug Evaluation and Research, Center for Biologics Evaluation and Research | Periodic B/R Evaluation Report questions/ answers | <a href="https://www.fda.gov/regulatory-information/search-fda-guidance-documents/e2cr2-periodic-B/R-evaluation-report-questions-and-answers">https://www.fda.gov/regulatory-information/search-fda-guidance-documents/e2cr2-periodic-B/R-evaluation-report-questions-and-answers</a>                                                                         |
| <b>Providing Postmarket Periodic Safety Reports in the ICH E2C(R2) Format (Periodic Benefit-Risk Evaluation Report)</b> | 28-Nov-16  | Center for Drug Evaluation and Research, Center for Biologics Evaluation and Research | Postmarket Periodic Safety Reports                | <a href="https://www.fda.gov/regulatory-information/search-fda-guidance-documents/providing-postmarket-periodic-safety-reports-ich-e2cr2-format-periodic-benefit-risk-evaluation">https://www.fda.gov/regulatory-information/search-fda-guidance-documents/providing-postmarket-periodic-safety-reports-ich-e2cr2-format-periodic-benefit-risk-evaluation</a> |

| Title                                                                                                                                                                                                                                         | Date        | FDA Organization                           | Topic                         | URL                                                                                                                                                                                                                                                                                                                                                                     |
|-----------------------------------------------------------------------------------------------------------------------------------------------------------------------------------------------------------------------------------------------|-------------|--------------------------------------------|-------------------------------|-------------------------------------------------------------------------------------------------------------------------------------------------------------------------------------------------------------------------------------------------------------------------------------------------------------------------------------------------------------------------|
| <b>Factors to Consider Regarding Benefit-Risk in Medical Device Product Availability, Compliance, and Enforcement Decisions: Guidance for Industry and Food and Drug Administration Staff</b>                                                 | 27-Dec-16   | Center for Devices and Radiological Health | Medical Device                | <a href="https://www.fda.gov/regulatory-information/search-fda-guidance-documents/factors-consider-regarding-benefit-risk-medical-device-product-availability-compliance-and">https://www.fda.gov/regulatory-information/search-fda-guidance-documents/factors-consider-regarding-benefit-risk-medical-device-product-availability-compliance-and</a>                   |
| <b>Factors to Consider When Making Benefit-Risk Determinations for Medical Device Investigational Device Exemptions: Guidance for Investigational Device Exemption Sponsors, Sponsor-Investigators and Food and Drug Administration Staff</b> | 13-Jan-17   | Center for Devices and Radiological Health | Medical Devices               | <a href="https://www.fda.gov/regulatory-information/search-fda-guidance-documents/factors-consider-when-making-benefit-risk-determinations-medical-device-investigational-device">https://www.fda.gov/regulatory-information/search-fda-guidance-documents/factors-consider-when-making-benefit-risk-determinations-medical-device-investigational-device</a>           |
| <b>Benefit-Risk Assessment in Drug Regulatory Decision-Making PDUFA VI Implementation Plan</b>                                                                                                                                                | 10-March-18 | Center for Drug Evaluation and Research    | Medication                    | <a href="https://www.fda.gov/media/112570/download">https://www.fda.gov/media/112570/download</a>                                                                                                                                                                                                                                                                       |
| <b>Benefit-Risk Factors to Consider When Determining Substantial Equivalence in Premarket Notifications (510(k)) with Different Technological Characteristics: Guidance for Industry and Food and Drug Administration Staff</b>               | 25-Sept-18  | Center for Devices and Radiological Health | 510(k) Premarket Notification | <a href="https://www.fda.gov/regulatory-information/search-fda-guidance-documents/benefit-risk-factors-consider-when-determining-substantial-equivalence-premarket-notifications-510k">https://www.fda.gov/regulatory-information/search-fda-guidance-documents/benefit-risk-factors-consider-when-determining-substantial-equivalence-premarket-notifications-510k</a> |

| Title                                                                                                                                                                                                                                             | Date              | FDA Organization                                  | Topic                          | URL                                                                                                                                                                                                                                                                                                                                                                          |
|---------------------------------------------------------------------------------------------------------------------------------------------------------------------------------------------------------------------------------------------------|-------------------|---------------------------------------------------|--------------------------------|------------------------------------------------------------------------------------------------------------------------------------------------------------------------------------------------------------------------------------------------------------------------------------------------------------------------------------------------------------------------------|
| <p><b>Opioid Analgesic Drugs: Considerations for Benefit-Risk Assessment Framework Guidance for Industry</b></p>                                                                                                                                  | <p>20-June-19</p> | <p>Center for Drug Evaluation and Research</p>    | <p>Medication/<br/>Opioids</p> | <p><a href="https://www.fda.gov/regulatory-information/search-fda-guidance-documents/opioid-analgesic-drugs-considerations-benefit-risk-assessment-framework-guidance-industry">https://www.fda.gov/regulatory-information/search-fda-guidance-documents/opioid-analgesic-drugs-considerations-benefit-risk-assessment-framework-guidance-industry</a></p>                   |
| <p><b>Consideration of Uncertainty in Making Benefit-Risk Determinations in Medical Device Premarket Approvals, De Novo Classifications, and Humanitarian Device Exemptions: Guidance for Industry and Food and Drug Administration Staff</b></p> | <p>30-Aug-19</p>  | <p>Center for Devices and Radiological Health</p> | <p>Medical Devices</p>         | <p><a href="https://www.fda.gov/regulatory-information/search-fda-guidance-documents/consideration-uncertainty-making-benefit-risk-determinations-medical-device-premarket-approvals-de">https://www.fda.gov/regulatory-information/search-fda-guidance-documents/consideration-uncertainty-making-benefit-risk-determinations-medical-device-premarket-approvals-de</a></p> |
| <p><b>Factors to Consider When Making Benefit-Risk Determinations in Medical Device Premarket Approval and De Novo Classifications: Guidance for Industry and Food and Drug Administration Staff</b></p>                                          | <p>30-Aug-19</p>  | <p>Center for Devices and Radiological Health</p> | <p>Medical Device</p>          | <p><a href="https://www.fda.gov/regulatory-information/search-fda-guidance-documents/factors-consider-when-making-benefit-risk-determinations-medical-device-premarket-approval-and-de">https://www.fda.gov/regulatory-information/search-fda-guidance-documents/factors-consider-when-making-benefit-risk-determinations-medical-device-premarket-approval-and-de</a></p>   |

## Appendix D - European Medicines Agency and Benefit-Risk Assessment

| Title                                                                                                                                                                                                      | Date                | Topic                              | URL                                                                                                                                                                                                                                                                                                                       |
|------------------------------------------------------------------------------------------------------------------------------------------------------------------------------------------------------------|---------------------|------------------------------------|---------------------------------------------------------------------------------------------------------------------------------------------------------------------------------------------------------------------------------------------------------------------------------------------------------------------------|
| <b>Guidance document for full implementation of the EMA Benefit Risk Assessment (includes a report template)</b>                                                                                           | last updated Oct-17 | Medicinal Products                 | <a href="https://www.ema.europa.eu/en/documents/regulatory-procedural-guideline/d80-assessment-report-overview-guidance-rev1017_en.pdf">https://www.ema.europa.eu/en/documents/regulatory-procedural-guideline/d80-assessment-report-overview-guidance-rev1017_en.pdf</a>                                                 |
| <b>Benefit-risk methodology project</b>                                                                                                                                                                    | 12-Mar-09           | Project overview                   | <a href="https://www.ema.europa.eu/en/documents/report/benefit-risk-methodology-project_en.pdf">https://www.ema.europa.eu/en/documents/report/benefit-risk-methodology-project_en.pdf</a>                                                                                                                                 |
| <b>Benefit-risk methodology project: Work package 1 report: Description of the current practice of benefit-risk assessment for centralised procedure products in the European Union regulatory network</b> | 25-May-11           | Current practices                  | <a href="https://www.ema.europa.eu/en/documents/report/benefit-risk-methodology-project-work-package-1-report-description-current-practice-benefit-risk_en.pdf">https://www.ema.europa.eu/en/documents/report/benefit-risk-methodology-project-work-package-1-report-description-current-practice-benefit-risk_en.pdf</a> |
| <b>Benefit-risk methodology project: Work package 2 report: Applicability of current tools and processes for regulatory benefit-risk assessment</b>                                                        | 31-Aug-10           | Applicability of current practices | <a href="https://www.ema.europa.eu/en/documents/report/benefit-risk-methodology-project-work-package-2-report-applicability-current-tools-processes_en.pdf">https://www.ema.europa.eu/en/documents/report/benefit-risk-methodology-project-work-package-2-report-applicability-current-tools-processes_en.pdf</a>         |
| <b>Benefit-risk methodology project: Work package 3 report: Field tests</b>                                                                                                                                | 31-Aug-11           | Field Tests                        | <a href="https://www.ema.europa.eu/en/documents/report/benefit-risk-methodology-project-work-package-3-report-field-tests_en.pdf">https://www.ema.europa.eu/en/documents/report/benefit-risk-methodology-project-work-package-3-report-field-tests_en.pdf</a>                                                             |
| <b>Benefit-risk methodology project: Work package 4 report: Benefit-risk tools and processes</b>                                                                                                           | 9-May-12            | Tools and Processes                | <a href="https://www.ema.europa.eu/en/documents/report/benefit-risk-methodology-project-work-package-4-report-benefit-risk-tools-processes_en.pdf">https://www.ema.europa.eu/en/documents/report/benefit-risk-methodology-project-work-package-4-report-benefit-risk-tools-processes_en.pdf</a>                           |

| Title                                                                                                                                                                   | Date      | Topic                                | URL                                                                                                                                                                                                                                                                                                                                                                   |
|-------------------------------------------------------------------------------------------------------------------------------------------------------------------------|-----------|--------------------------------------|-----------------------------------------------------------------------------------------------------------------------------------------------------------------------------------------------------------------------------------------------------------------------------------------------------------------------------------------------------------------------|
| <b>Benefit-risk methodology project: Update on work package 5: Effects table pilot (Phase I)</b>                                                                        | 6-Feb-14  | Effects table                        | <a href="https://www.ema.europa.eu/en/documents/report/benefit-risk-methodology-project-update-work-package-5-effects-table-pilot-phase-i_en.pdf">https://www.ema.europa.eu/en/documents/report/benefit-risk-methodology-project-update-work-package-5-effects-table-pilot-phase-i_en.pdf</a>                                                                         |
| <b>Benefit-risk methodology project - Report on risk perception study module</b>                                                                                        | 24-Jan-12 | Risk Perception                      | <a href="https://www.ema.europa.eu/en/documents/report/benefit-risk-methodology-project-report-risk-perception-study-module_en.pdf">https://www.ema.europa.eu/en/documents/report/benefit-risk-methodology-project-report-risk-perception-study-module_en.pdf</a>                                                                                                     |
| <b>Report of the CHMP working group on benefit-risk assessment models and methods</b>                                                                                   | 19-Jan-07 | Models and Methods                   | <a href="https://www.ema.europa.eu/en/documents/regulatory-procedural-guideline/report-chmp-working-group-benefit-risk-assessment-models-methods_en.pdf">https://www.ema.europa.eu/en/documents/regulatory-procedural-guideline/report-chmp-working-group-benefit-risk-assessment-models-methods_en.pdf</a>                                                           |
| <b>Reflection paper on benefit-risk assessment methods in the context of the evaluation of marketing authorisation applications of medicinal products for human use</b> | 19-Mar-08 | Marketing Authorisation Applications | <a href="https://www.ema.europa.eu/en/documents/regulatory-procedural-guideline/reflection-paper-benefit-risk-assessment-methods-context-evaluation-marketing-authorisation_en-0.pdf">https://www.ema.europa.eu/en/documents/regulatory-procedural-guideline/reflection-paper-benefit-risk-assessment-methods-context-evaluation-marketing-authorisation_en-0.pdf</a> |
| <b>Benefit-risk methodology project: Comments received from Dr William Holden on the work package 2 report</b>                                                          | 2-Nov-10  | Researcher comments                  | <a href="https://www.ema.europa.eu/en/documents/other/benefit-risk-methodology-project-comments-received-dr-william-holden-work-package-2-report_en.pdf">https://www.ema.europa.eu/en/documents/other/benefit-risk-methodology-project-comments-received-dr-william-holden-work-package-2-report_en.pdf</a>                                                           |
| <b>Benefit-risk methodology project: Reply to the comments received from Dr William Holden on the work package 2 report</b>                                             | 6-May-11  | Comments                             | <a href="https://www.ema.europa.eu/en/documents/other/benefit-risk-methodology-project-reply-comments-received-dr-william-holden-work-package-2-report_en.pdf">https://www.ema.europa.eu/en/documents/other/benefit-risk-methodology-project-reply-comments-received-dr-william-holden-work-package-2-report_en.pdf</a>                                               |

**Appendix E - National Academies of Science, Engineering, and Medicine (including Institute of Medicine) and Benefit-Risk Assessment**

| Title                                                                                                                                    | Date       | Topic                      | URL                                                                                                                                                                                                                                                                                                                                                 |
|------------------------------------------------------------------------------------------------------------------------------------------|------------|----------------------------|-----------------------------------------------------------------------------------------------------------------------------------------------------------------------------------------------------------------------------------------------------------------------------------------------------------------------------------------------------|
| <b>The Future of Drug Safety: Promoting and Protecting the Health of the Public</b>                                                      | 22-Sept-06 | Medicinal Products         | <a href="http://www.nationalacademies.org/hmd/Reports/2006/The-Future-of-Drug-Safety-Promoting-and-Protecting-the-Health-of-the-Public.aspx">http://www.nationalacademies.org/hmd/Reports/2006/The-Future-of-Drug-Safety-Promoting-and-Protecting-the-Health-of-the-Public.aspx</a>                                                                 |
| <b>Understanding the Benefits and Risks of Pharmaceuticals. Workshop Summary</b>                                                         | 15-Aug-07  | Medicinal Products         | <a href="http://www.nationalacademies.org/hmd/Reports/2007/Understanding-the-Benefits-and-Risks-of-Pharmaceuticals-Workshop-Summary.aspx">http://www.nationalacademies.org/hmd/Reports/2007/Understanding-the-Benefits-and-Risks-of-Pharmaceuticals-Workshop-Summary.aspx</a>                                                                       |
| <b>Ethical and Scientific Issues in Studying the Safety of Approved Drugs</b>                                                            | 1-May-12   | Medicinal Products         | <a href="http://www.nationalacademies.org/hmd/Reports/2012/Ethical-and-Scientific-Issues-in-Studying-the-Safety-of-Approved-Drugs.aspx">http://www.nationalacademies.org/hmd/Reports/2012/Ethical-and-Scientific-Issues-in-Studying-the-Safety-of-Approved-Drugs.aspx</a>                                                                           |
| <b>Characterizing and Communicating Uncertainty in the Assessment of Benefits and Risks of Pharmaceutical Products: Workshop Summary</b> | 26-Sept-14 | Medicinal Products         | <a href="http://nationalacademies.org/hmd/Reports/2014/Characterizing-and-Communicating-Uncertainty-in-the-Assessment-of-Benefits-and-Risks-of-Pharmaceutical-Products.aspx">http://nationalacademies.org/hmd/Reports/2014/Characterizing-and-Communicating-Uncertainty-in-the-Assessment-of-Benefits-and-Risks-of-Pharmaceutical-Products.aspx</a> |
| <b>Pain Management and the Opioid Epidemic: Balancing Societal and Individual Benefits and Risks of Prescription Opioid Use</b>          | 1-July-17  | Medicinal Products/Opioids | <a href="https://www.ncbi.nlm.nih.gov/pubmed/29023083">https://www.ncbi.nlm.nih.gov/pubmed/29023083</a>                                                                                                                                                                                                                                             |
| <b>Public Health Consequences of E-cigarettes</b>                                                                                        | 23-Jan-18  | Electronic Cigarettes      | <a href="http://nationalacademies.org/hmd/Reports/2018/public-health-consequences-of-e-cigarettes.aspx">http://nationalacademies.org/hmd/Reports/2018/public-health-consequences-of-e-cigarettes.aspx</a>                                                                                                                                           |
| <b>The Role of Nonpharmacological Approaches to Pain Management: A Workshop</b>                                                          | 4-Dec-18   | Non-drug Interventions     | <a href="http://nationalacademies.org/hmd/Activities/Global/InnovationHealthProfEducation/2018-DEC-5.aspx">http://nationalacademies.org/hmd/Activities/Global/InnovationHealthProfEducation/2018-DEC-5.aspx</a>                                                                                                                                     |
| <b>Framing Opioid Prescribing Guidelines for Acute Pain: Developing the Evidence</b>                                                     | 19-Dec-19  | Medicinal Products/Opioids | <a href="http://www.nationalacademies.org/hmd/Reports/2019/framing-opioid-prescribing-guidelines-for-acute-pain-developing-the-evidence.aspx">http://www.nationalacademies.org/hmd/Reports/2019/framing-opioid-prescribing-guidelines-for-acute-pain-developing-the-evidence.aspx</a>                                                               |
